# Supplementary material for: Bimetallic core-based cuboctahedral core–shell nanoclusters for the formation of hydrogen peroxide (2e−reduction) over water (4e−reduction): role of core metals
Source: Royal Society of Chemistry journal article supplement (doi:10.1039/c7nr03002a), 2017-01-01
Supplement: c7nr03002a1.pdf [file c7nr03002a1.pdf]

## Supporting Information

### Bimetallic Core-Based Cuboctahedral Core-Shell Nanocluster for Hydrogen Peroxide ( $2e^-$ reduction) over Water ( $4e^-$ reduction) Formation: Role of Core Metals

Arup Mahata,<sup>†</sup> Biswarup Pathak<sup>†, #, \*</sup>

<sup>†</sup>Discipline of Chemistry, School of Basic Sciences, and <sup>#</sup>Discipline of Metallurgy Engineering and Materials Science, Indian Institute of Technology (IIT) Indore, Indore, Madhya Pradesh 453552, India

Email: [biswarup@iiti.ac.in](mailto:biswarup@iiti.ac.in)

### Contents

**Figure S1:** A ( $3 \times 3$ ) supercell of periodic AuCo@Pt(111) surface

**Figure S2:** Optimized geometry and segregation energy of the NCs.

**Test S1:** Computational Details

**Figure S3:** Adsorption behaviours of the intermediates on Au<sub>10</sub>Co<sub>9</sub>@Pt<sub>60</sub> NC

**Table S1:** Adsorption energies (in eV) of the reaction intermediates on Au<sub>10</sub>Co<sub>9</sub>@Pt<sub>60</sub> NC at edge and facet sites.

**Table S2:** Adsorption energies (in eV) of the reaction intermediates on Au<sub>9</sub>Co<sub>10</sub>@Pt<sub>60</sub> and Au<sub>10</sub>Co<sub>9</sub>@Pt<sub>60</sub> NC.

**Table S3:** Reaction free energies ( $\Delta G$  in eV) and activation barriers ( $\Delta G^\ddagger$  in eV) for the all-possible elementary reactions on the (111) facet of the NCs.

**Table S4:** Rate constants values for the elementary reactions at 300 K on different NCs.

**Table S5:** Reaction free energies (in eV) and activation barriers (in eV, parenthesis) on the edge and facet site of Au<sub>10</sub>Co<sub>9</sub>@Pt<sub>60</sub> NC.

**Figure S4:** Adsorption behaviors of the intermediates on Au<sub>9</sub>Co<sub>9</sub>Pt<sub>1</sub>@Au<sub>1</sub>Pt<sub>59</sub> NC

**Table S6:** Reaction free energies (in eV) and activation barriers (in eV) on the Au<sub>9</sub>Co<sub>9</sub>Pt<sub>1</sub>@Au<sub>1</sub>Pt<sub>59</sub> and Au<sub>10</sub>Co<sub>9</sub>@Pt<sub>60</sub> NC.

**Table S7:** Adsorption energies (in eV) of the reaction intermediates on periodic AuCo@Pt(111) surface and Au<sub>10</sub>Co<sub>9</sub>@Pt<sub>60</sub> NC.

**Figure S1:** (a) A  $(3 \times 3)$  supercell of periodic AuCo@Pt(111) surface and (b) core atoms arrangements of Au<sub>10</sub>Co<sub>9</sub>@Pt<sub>60</sub> NC.

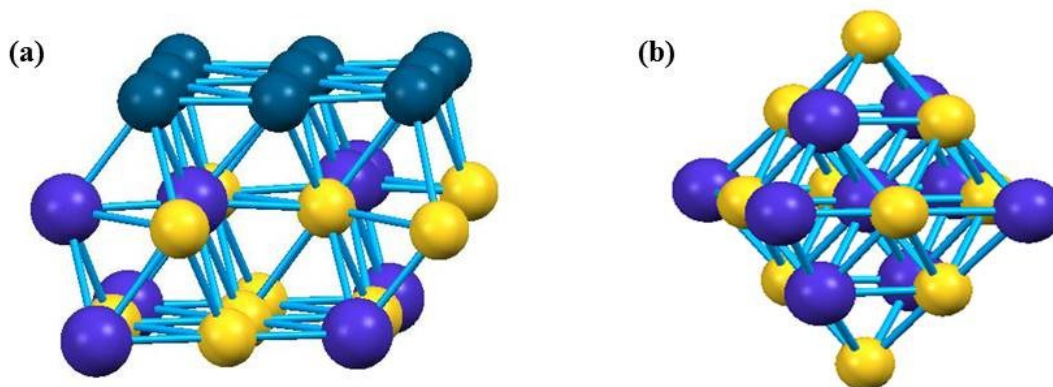

**Figure S2:** Optimized geometry and segregation energy of the NCs. The atoms with larger size represent the exchanged atoms.

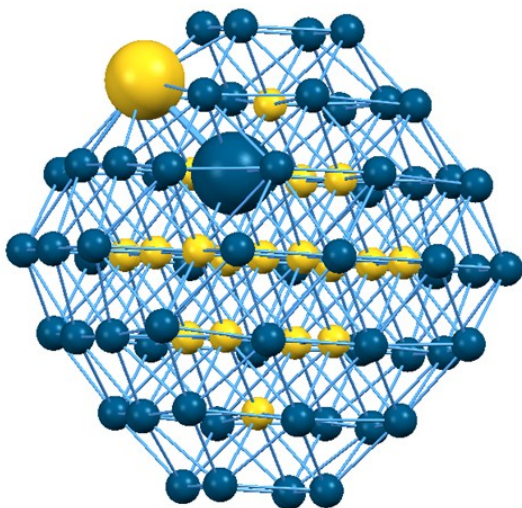

**Au<sub>18</sub>Pt<sub>1</sub>@Au<sub>1</sub>Pt<sub>59</sub>**

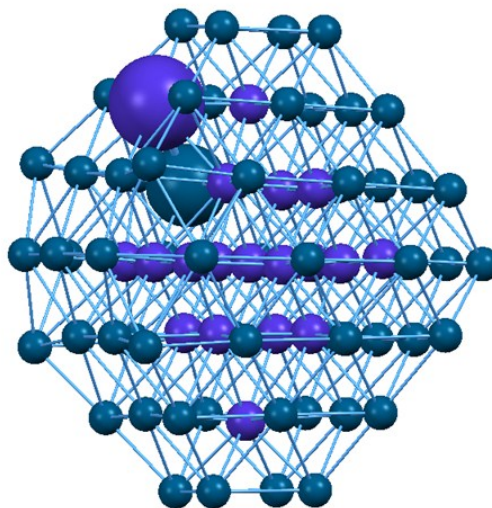

**Co<sub>18</sub>Pt<sub>1</sub>@Co<sub>1</sub>Pt<sub>59</sub>**

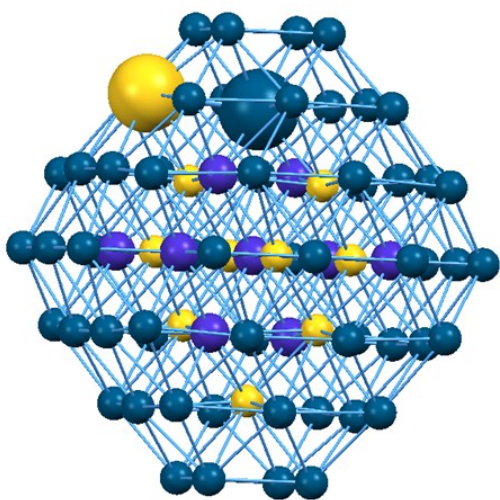

**Au<sub>9</sub>Co<sub>9</sub>Pt<sub>1</sub>@Au<sub>1</sub>Pt<sub>59</sub>**

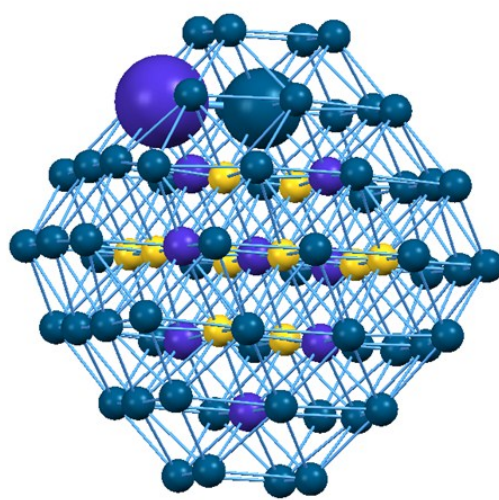

**Au<sub>10</sub>Co<sub>8</sub>Pt<sub>1</sub>@Co<sub>1</sub>Pt<sub>59</sub>**

### Test S1: Computational Details

Plane wave with a kinetic energy cut off of 470 eV is used to expand the electronic wave functions. A  $22 \times 22 \times 22 \text{ \AA}^3$  cubic supercell is used to optimize the NCs to rule out the possibility of interactions between the periodically repeated metal clusters. The Brillouin zone is sampled with a Gamma point (1×1×1) for clusters. The total energies of the NCs are improved in the range of 0.0001-0.002 eV if the k-point mesh set to  $2 \times 2 \times 2$ . Therefore, we have used Gamma point for all the calculations to save the computational cost. For electronic structure calculations, a  $2 \times 2 \times 2$  k-point mesh is used. All the atoms of NCs are full relaxed during the structural relaxation. During relaxation of periodic surface, the bottom one layer is fixed and the top two layers are relaxed. A 12 Å of vacuum is used along the z-direction to avoid any periodic interactions. The Brillouin zone is sampled using a  $3 \times 3 \times 1$  k-point grid for the surface calculations. The convergence criteria for total energy and forces are set at  $10^{-4}$  eV and  $<0.02$  eV/Å, respectively. Spin-polarized calculations are performed for all the calculations. Six intermediate images are used in each CI-NEB pathway. Vibrational frequencies for the initial, transition and final states of the reactions are calculated and the transition states are confirmed by the presence of one imaginary frequency. Zero-point energy (ZPE) is calculated using the following equation:

$$\text{ZPE} = \sum_i 1/2 h \nu_i$$

where h is the Planck constant and  $\nu_i$  is the frequency of the  $i^{\text{th}}$  vibrational mode. The reaction free energies ( $\Delta G$ ) are calculated using the following equation:

$$\Delta G = \Delta E + \Delta \text{ZPE} - T\Delta S$$

where  $\Delta E$ ,  $\Delta \text{ZPE}$  and  $\Delta S$  are the difference in total energies, zero-point energies and entropy between the product/TS and reactant. Gas phase entropy values have been taken from NIST

database.<sup>1</sup> The activation barriers and reaction free energies have been calculated in thermochemical way, whereas the free energy diagram has been plotted in electrochemical way. The forward ( $k_i$ ) rate constants for all the elementary steps are calculated using the following equation:

$$k_i = \left( \frac{k_B T}{h} \right) \left( \frac{q_{TS}}{q_R} \right) e^{-\Delta G^\ddagger / k_B T}$$

where  $k_B$  is the Boltzmann constant, T is the temperature, h is the Plank constant. Here,  $q_{TS}$  and  $q_R$  are the vibrational partition functions for the transition state and reactant structures, respectively *and*  $\Delta G^\ddagger$  is the Gibbs free energy barrier for the initial and final state of the elementary reaction. Bader charge<sup>2</sup> has been calculated using Henkelman programme.<sup>3-4</sup>

#### References:

- [1] <http://webbook.nist.gov/chemistry/>
- [2] R. F. W. Bader, *Oxford University Press: USA*, **1994**.
- [3] G. Henkelman, A. Arnaldsson and H. Jonsson, *Comput. Mater. Sci.*, 2006, **36**, 354-360.
- [4] E. Sanville, S. D. Kenny, R. Smith and G. Henkelman, *J. Comput. Chem.*, 2007, **28**, 899-908.

**Figure S3:** Adsorption behaviours of the intermediates on Au<sub>10</sub>Co<sub>9</sub>@Pt<sub>60</sub> NC: (a) \*O<sub>2</sub>, (b) \*OOH, (c) \*OH, (d) \*H<sub>2</sub>O<sub>2</sub>, (e) \*H<sub>2</sub>O, (f) \*O and (g) \*H.

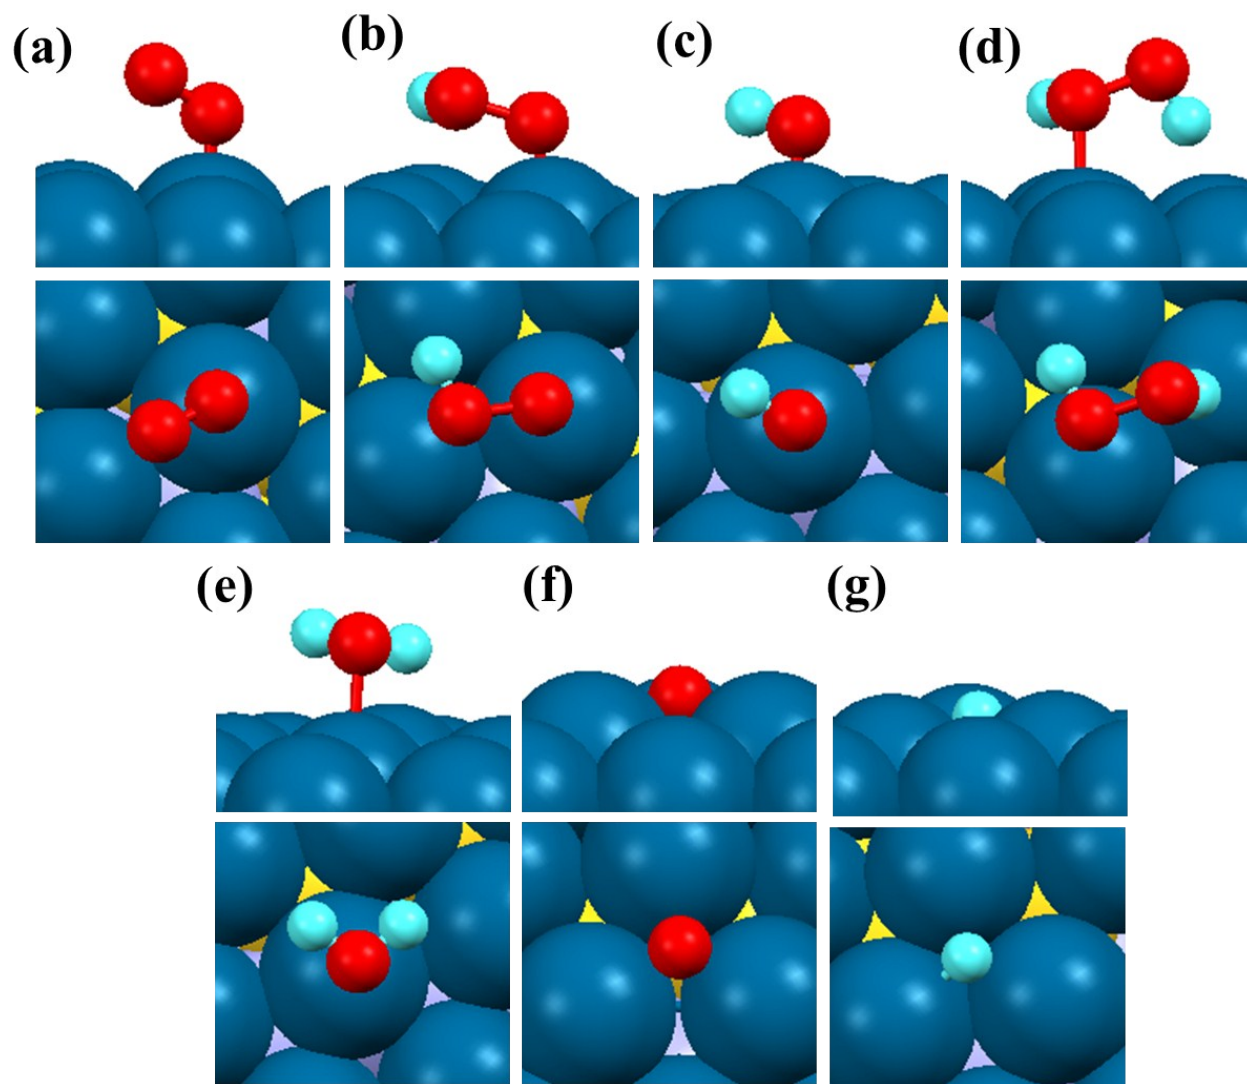

**Table S1:** Adsorption energies (in eV) of the reaction intermediates on Au<sub>10</sub>Co<sub>9</sub>@Pt<sub>60</sub> NC at edge and facet sites.

| Adsorbed Species               | Au <sub>10</sub> Co <sub>9</sub> @Pt <sub>60</sub> |           |
|--------------------------------|----------------------------------------------------|-----------|
|                                | Edge                                               | Facet     |
| *O <sub>2</sub>                | -1.80 (b)                                          | -0.22 (t) |
| *O                             | -4.86 (b)                                          | -5.40 (f) |
| *OH                            | -2.57 (t)                                          | -2.12 (t) |
| *OOH                           | -1.78 (b)                                          | -1.12 (b) |
| *H <sub>2</sub> O <sub>2</sub> | -0.38 (b)                                          | -0.28 (b) |
| *H <sub>2</sub> O              | -0.25 (t)                                          | -0.22 (t) |
| *H                             | -2.91 (b)                                          | -2.81 (f) |
| *H <sub>2</sub>                | -0.23 (t)                                          | -         |



**Table S2:** Adsorption energies (in eV) of the reaction intermediates on Au<sub>9</sub>Co<sub>10</sub>@Pt<sub>60</sub> and Au<sub>10</sub>Co<sub>9</sub>@Pt<sub>60</sub> NC.

| <b>Adsorbed Species</b>        | <b>Au<sub>9</sub>Co<sub>10</sub>@Pt<sub>60</sub></b> | <b>Au<sub>10</sub>Co<sub>9</sub>@Pt<sub>60</sub></b> |
|--------------------------------|------------------------------------------------------|------------------------------------------------------|
| *O <sub>2</sub>                | -0.23 (t)                                            | -0.22 (t)                                            |
| *O                             | -5.26 (f)                                            | -5.40 (f)                                            |
| *OH                            | -2.17 (t)                                            | -2.12 (t)                                            |
| *OOH                           | -1.18 (b)                                            | -1.12 (b)                                            |
| *H <sub>2</sub> O <sub>2</sub> | -0.27 (b)                                            | -0.28 (b)                                            |
| *H <sub>2</sub> O              | -0.17 (t)                                            | -0.22 (t)                                            |

**Table S3:** Reaction free energies ( $\Delta G$  in eV) and activation barriers ( $\Delta G^\ddagger$  in eV) for the all-possible elementary reactions on the (111) facet of the  $\text{Co}_{19}@Pt_{60}$ ,  $\text{Au}_{19}@Pt_{60}$ ,  $\text{Au}_{10}\text{Co}_{19}@Pt_{60}$  and  $\text{Pt}_{79}$  NCs.

| Steps | Elementary Reactions                                        | $\text{Au}_{19}@Pt_{60}$ |                     | $\text{Co}_{19}@Pt_{60}$ |                     | $\text{Au}_{10}\text{Co}_{19}@Pt_{60}$ |                     | $\text{Pt}_{79}$ |                     |
|-------|-------------------------------------------------------------|--------------------------|---------------------|--------------------------|---------------------|----------------------------------------|---------------------|------------------|---------------------|
|       |                                                             | $\Delta G$               | $\Delta G^\ddagger$ | $\Delta G$               | $\Delta G^\ddagger$ | $\Delta G$                             | $\Delta G^\ddagger$ | $\Delta G$       | $\Delta G^\ddagger$ |
| 1     | $*\text{O}_2 \rightarrow *\text{O} + *\text{O}$             | -2.81                    | 0.76                | -2.80                    | 0.07                | -2.27                                  | 0.06                | -2.33            | 0.00                |
| 2     | $*\text{O}_2 + *\text{H} \rightarrow *\text{OOH}$           | -0.17                    | 0.00                | 1.30                     | 1.27                | -0.21                                  | 0.12                | -0.47            | 0.04                |
| 3     | $*\text{O} + *\text{H} \rightarrow *\text{OH}$              | 0.49                     | 1.02                | -0.46                    | 0.38                | 0.30                                   | 0.50                | 0.03             | 0.25                |
| 4     | $*\text{OOH} \rightarrow *\text{O} + *\text{OH}$            | -2.18                    | 0.66                | -3.35                    | 0.11                | -1.79                                  | 0.61                | -1.92            | 0.00                |
| 5     | $*\text{OOH} + *\text{H} \rightarrow *\text{H}_2\text{O}_2$ | 0.19                     | 1.21                | -0.23                    | 0.95                | -0.21                                  | 0.46                | 0.11             | 1.14                |
| 6     | $*\text{H}_2\text{O}_2 \rightarrow *\text{OH} + *\text{OH}$ | -1.46                    | 0.21                | -0.80                    | 0.08                | -0.97                                  | 0.20                | -1.71            | 0.06                |
| 7     | $*\text{OH} + *\text{H} \rightarrow *\text{H}_2\text{O}$    | -0.06                    | 0.39                | -1.16                    | 0.20                | -0.76                                  | 0.12                | -0.43            | 0.00                |

**Table S4:** Rate constants values for the elementary reactions at 300 K on different NCs.

| Steps | Elementary reactions                           | Au <sub>10</sub> Co <sub>9</sub> @Pt <sub>60</sub> | Au <sub>19</sub> @Pt <sub>60</sub> | Co <sub>19</sub> @Pt <sub>60</sub> | Pt <sub>79</sub>       |
|-------|------------------------------------------------|----------------------------------------------------|------------------------------------|------------------------------------|------------------------|
| 1     | $\overset{k_1}{*O_2 \rightarrow *O+*O}$        | $6.29 \times 10^{11}$                              | $2.61 \times 10^{00}$              | $4.35 \times 10^{11}$              | $8.66 \times 10^{12}$  |
| 2     | $\overset{k_2}{*O_2+*H \rightarrow *OOH}$      | $6.63 \times 10^{10}$                              | $6.08 \times 10^{13}$              | $4.07 \times 10^{-09}$             | $1.36 \times 10^{12}$  |
| 3     | $\overset{k_3}{*O+*H \rightarrow *OH}$         | $1.13 \times 10^{04}$                              | $2.57 \times 10^{-05}$             | $1.61 \times 10^{06}$              | $1.32 \times 10^{08}$  |
| 4     | $\overset{k_4}{*OOH \rightarrow *O+*OH}$       | $4.82 \times 10^{02}$                              | $6.13 \times 10^{01}$              | $9.06 \times 10^{10}$              | $7.92 \times 10^{12}$  |
| 5     | $\overset{k_5}{*H+*OOH \rightarrow *H_2O_2}$   | $1.08 \times 10^{05}$                              | $2.85 \times 10^{-08}$             | $7.43 \times 10^{-04}$             | $5.39 \times 10^{-07}$ |
| 6     | $\overset{k_6}{*H_2O_2 \rightarrow *OH + *OH}$ | $2.93 \times 10^{09}$                              | $2.09 \times 10^{09}$              | $3.83 \times 10^{11}$              | $8.73 \times 10^{11}$  |
| 7     | $\overset{k_7}{*H+*OH \rightarrow *H_2O}$      | $6.20 \times 10^{10}$                              | $1.76 \times 10^{06}$              | $3.38 \times 10^{09}$              | $1.67 \times 10^{13}$  |

**Table S5:** Reaction free energies (in eV) and activation barriers (in eV, parenthesis) on the edge and facet site of Au<sub>10</sub>Co<sub>9</sub>@Pt<sub>60</sub> NC.

| Elementary steps                           | Au <sub>10</sub> Co <sub>9</sub> @Pt <sub>60</sub> |              |
|--------------------------------------------|----------------------------------------------------|--------------|
|                                            | Edge                                               | Facet        |
| *O <sub>2</sub> → *O + *O                  | -1.57 (0.03)                                       | -2.27 (0.06) |
| *O <sub>2</sub> + *H → *OOH                | 0.47 (0.44)                                        | -0.21 (0.12) |
| *OOH → *O + *OH                            | -2.04 (-)                                          | -1.79 (0.61) |
| *OOH + *H → *H <sub>2</sub> O <sub>2</sub> | 0.06 (0.24)                                        | -0.21 (0.46) |

**Figure S4:** Adsorption behaviors of the reaction intermediates ( $*O_2$ ,  $*OOH$  and  $*H_2O_2$ ) on  $Au_9Co_9Pt_1@Au_1Pt_{59}NC$

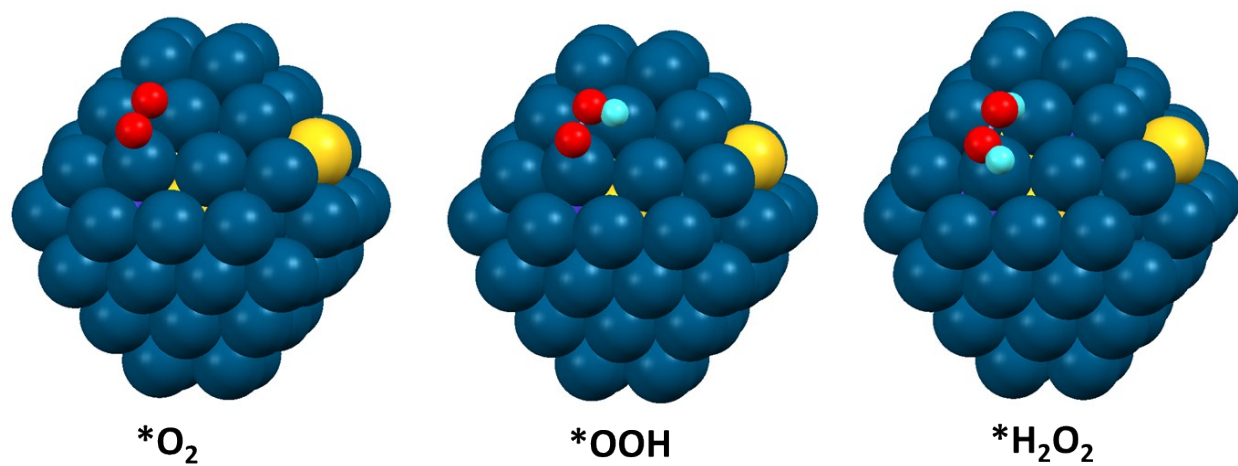

**Table S6:** Reaction free energies (in eV) and activation barriers (in eV) of two important H<sub>2</sub>O<sub>2</sub> formation steps on the Au<sub>9</sub>Co<sub>9</sub>Pt<sub>1</sub>@Au<sub>1</sub>Pt<sub>59</sub> and Au<sub>10</sub>Co<sub>9</sub>@Pt<sub>60</sub> NC.

| Nanoclusters                                                                                         | <b>*O<sub>2</sub> + *H → *OOH</b> |                     | <b>*OOH + *H → *H<sub>2</sub>O<sub>2</sub></b> |                     |
|------------------------------------------------------------------------------------------------------|-----------------------------------|---------------------|------------------------------------------------|---------------------|
|                                                                                                      | $\Delta G$                        | $\Delta G^\ddagger$ | $\Delta G$                                     | $\Delta G^\ddagger$ |
| Au <sub>10</sub> Co <sub>9</sub> @Pt <sub>60</sub>                                                   | -0.21                             | 0.12                | -0.21                                          | 0.46                |
| Au <sub>9</sub> Co <sub>9</sub> Pt <sub>1</sub> @Au <sub>1</sub> Pt <sub>59</sub><br>(Au-segregated) | -0.26                             | 0.11                | -0.25                                          | 0.37                |

**Table S7:** Adsorption energies (in eV) of the reaction intermediates on periodic AuCo@Pt(111) surface and Au<sub>10</sub>Co<sub>9</sub>@Pt<sub>60</sub> NC.

| <b>Adsorbed Species</b>        | <b>Periodic AuCo@Pt(111) surface</b> | <b>Au<sub>10</sub>Co<sub>9</sub>@Pt<sub>60</sub></b> |
|--------------------------------|--------------------------------------|------------------------------------------------------|
| *O <sub>2</sub>                | -0.11 (t)                            | -0.22 (t)                                            |
| *O                             | -3.45 (f)                            | -5.40 (f)                                            |
| *OH                            | -1.99 (t)                            | -2.12 (t)                                            |
| *OOH                           | -0.88 (b)                            | -1.12 (b)                                            |
| *H <sub>2</sub> O <sub>2</sub> | -0.22 (b)                            | -0.28 (b)                                            |
| *H <sub>2</sub> O              | -0.15 (t)                            | -0.22 (t)                                            |
| *H                             | -2.61 (f)                            | -2.81 (f)                                            |
